# Supplementary material for: Enhancing the thermoelectric performance of Cu1.8S by Sb/Sn co-doping and incorporating multiscale defects to scatter heat-carrying phonons
Source: Royal Society of Chemistry journal article supplement (doi:10.1039/c9tc01096c), 2019-01-01
Supplement: c9tc01096c1.pdf [file c9tc01096c1.pdf]

## Supporting Information

### Enhancing thermoelectric performance of Cu<sub>1.8</sub>S by Sb/Sn co-doping and incorporating multiscale defects to scatter heat-carrying phonons

Huaichao Tang, Hua-Lu Zhuang, Bowen Cai, Asfandiyar, Jinfeng Dong, Fu-Hua Sun and Jing-Feng Li\*

State Key Laboratory of New Ceramics and Fine Processing, School of Materials Science and Engineering, Tsinghua University, Beijing 100084, China

#### 1. Density $\rho$ , heat capacity $C_p$ and thermal diffusivity

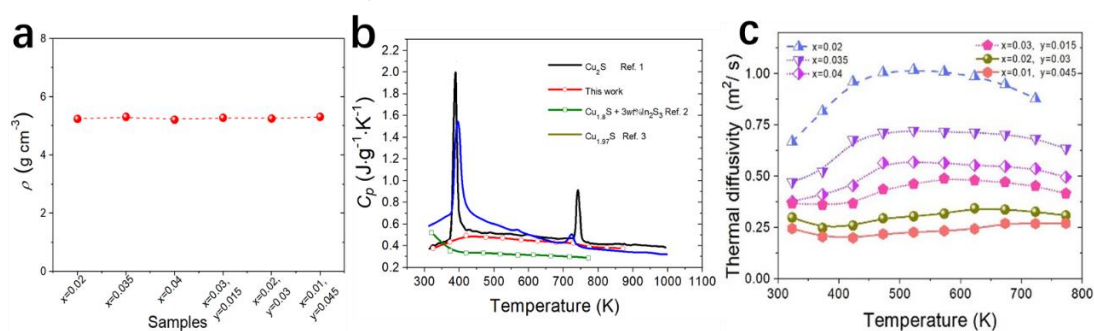

**Fig. S1.** a) density  $\rho$ , temperature dependence of b) heat capacity  $C_p$  and c) thermal diffusivity.<sup>1-3</sup>

#### 2. The SEM images of all samples.

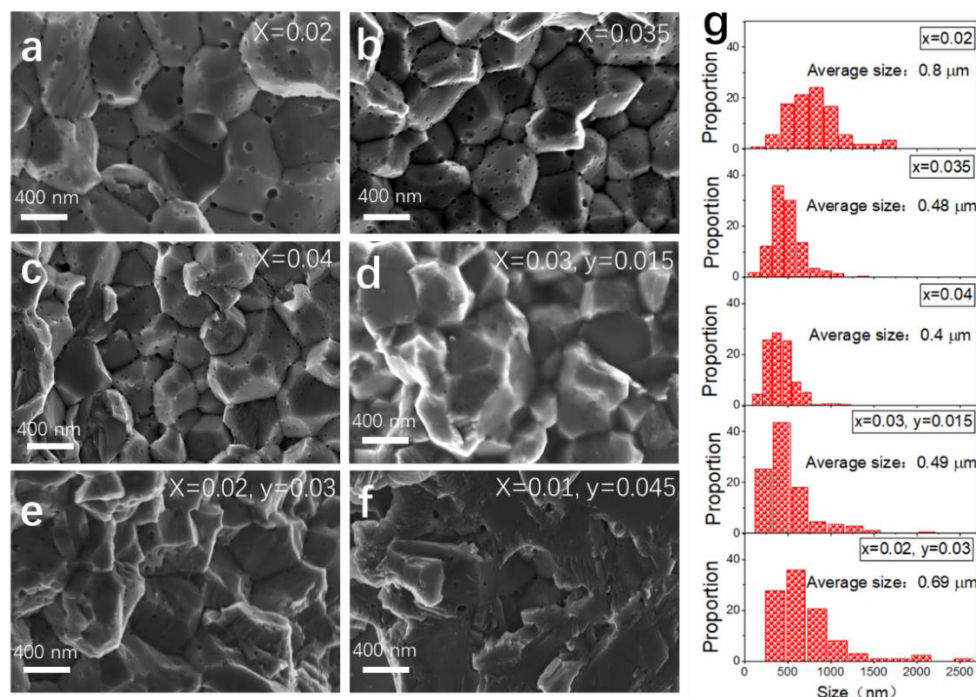

**Fig.S2. a) - f)** the typical SEM cross-sectional images of all samples. **g)** the distribution of grain sizes based on the SEM images. Because the grains of the sample  $\text{Cu}_{1.8}\text{Sb}_{0.01}\text{Sn}_{0.045}\text{S}$  are linked together and can not be distinguished clearly, the distribution of grain size has not been counted. However, it can be clearly seen that the average grain size of the  $\text{Cu}_{1.8}\text{Sb}_x\text{Sn}_y\text{S}$  samples increases with the increase of Sn content.

### 3. Calculated electrical thermal conductivity $\kappa_e$ and lattice thermal conductivity $\kappa_l$

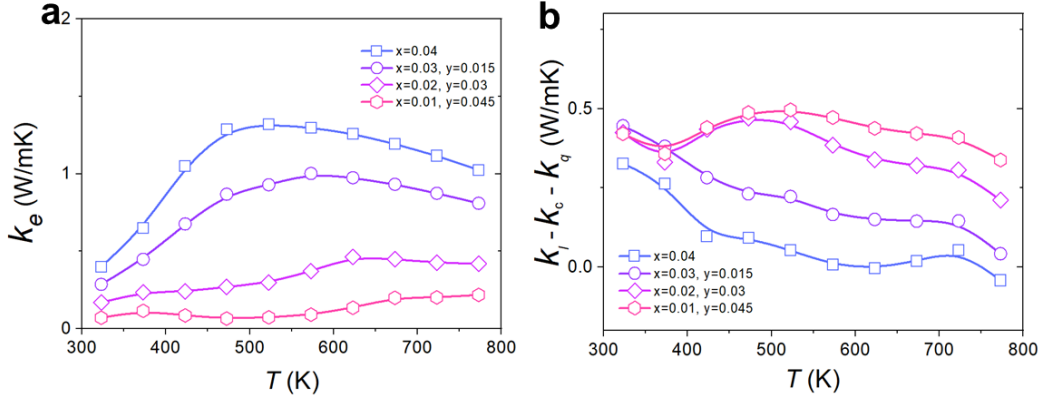

**Fig.S3.** Temperature dependence of **a)** electrical thermal conductivity  $\kappa_e$  and **b)** apparent lattice thermal conductivity ( $\kappa_l - \kappa_c - \kappa_q$ ).

$$\kappa_{total} = \kappa_e + \kappa_l - \kappa_c - \kappa_q = LT\sigma + \kappa_l - \kappa_c - \kappa_q \quad (1)$$

The  $\kappa_c$  and  $\kappa_q$  correspond to the reduced lattice thermal conductivity of phonons scattered by carriers and liquid-like  $\text{Cu}^+$  behavior. The  $L$  was calculated by SPB model.  $r$  is selected to be  $-1/2$  due to the hypothetical acoustic phonon scattering mechanism. The computational equations are as follows.

$$L = \left(\frac{\kappa_B}{e}\right)^2 \left\{ \frac{(r + 7/2)F_{r+5/2}(\eta)}{(r + 3/2)F_{r+1/2}(\eta)} - \left[ \frac{(r + 5/2)F_{r+3/2}(\eta)}{(r + 3/2)F_{r+1/2}(\eta)} \right]^2 \right\} \quad (2)$$

$$\alpha = \pm \left(\frac{\kappa_B}{e}\right)^2 \left[ \frac{(r + 5/2)F_{r+3/2}(\eta)}{(r + 3/2)F_{r+1/2}(\eta)} - \eta \right] \quad (3)$$

$$n = \frac{2(2\pi m^* \kappa_B T)^{3/2}}{\hbar^{3/2}} F_{r+1/2}(\eta) \quad (4)$$

$$F_s(\eta) = \int_0^\infty \frac{x^s dx}{1 + \exp(x - \eta)} \quad (5)$$

### 4. The thermal cycle testing of $\text{Cu}_{1.8}\text{Sb}_{0.02}\text{Sn}_{0.03}\text{S}$ sample.

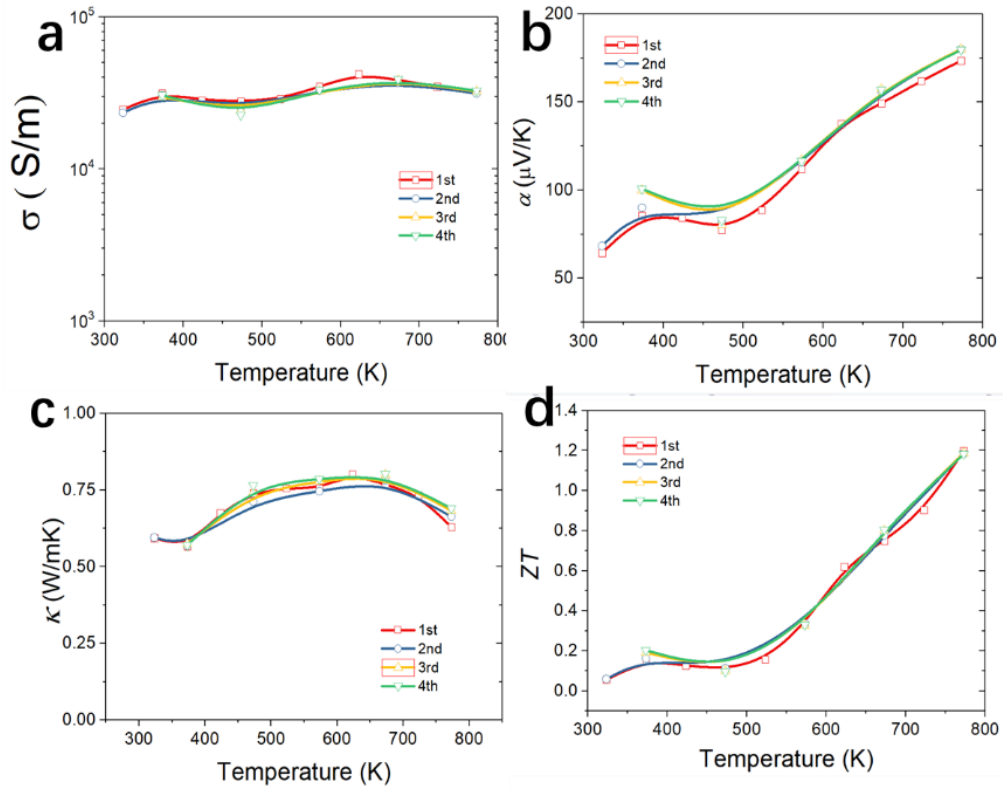

**Fig. S4.** Temperature dependence of TE properties of  $\text{Cu}_{1.8}\text{Sb}_{0.02}\text{Sn}_{0.03}\text{S}$  in cyclic test.

## Reference

1. Y. He, T. Day, T. Zhang, H. Liu, X. Shi, L. Chen and G. J. Snyder, *Adv Mater*, 2014, **26**, 3974-3978.
2. Z. H. Ge, X. Chong, D. Feng, Y. X. Zhang, Y. Qiu, L. Xie, P. W. Guan, J. Feng and J. He, *Materials Today Physics*, 2019, **8**, 71-77.
3. L. Zhao, X. Wang, F. Y. Fei, J. Wang, Z. Cheng, S. Dou, J. Wang and G. J. Snyder, *Journal of Materials Chemistry A*, 2015, **3**, 9432-9437.
